# Supplementary material for: Surgical Approaches and Their Outcomes in the Treatment of Cubital Tunnel Syndrome
Source: Front Surg. 2018 Jul 26;5:48. doi: 10.3389/fsurg.2018.00048 (PMC6071516; doi:10.3389/fsurg.2018.00048)
Supplement: Supplementary file 1 [file Table_1.xlsx]

## Sheet: Bishop Score
	Table 1A
	Bishop Score
Residual symptoms
	None	3
	Little/Intermittent	2
	Moderate	1
	Severe	0
Subjective improvement
	Better	2
	Unchanged	1
	Worse	0
Ability to work
	Working in old job	2
	Changed job due to complaints	1
	Incapable of working	0
Muscle strength
	Better	1
	Unchanged	0
Sensory disturbance
	Better	1
	Unchanged	0
Evaluation
	Excellent	8-9
	Good	6-7
	Fair	4-5
	Poor	≤ 3
