# Supplementary material for: Surgical Approaches and Their Outcomes in the Treatment of Cubital Tunnel Syndrome
Source: Front Surg. 2018 Jul 26;5:48. doi: 10.3389/fsurg.2018.00048 (PMC6071516; doi:10.3389/fsurg.2018.00048)
Supplement: Supplementary file 12 [file Table_12.xlsx]

## Sheet: IM
	Table 2E
	Authors (year)	Method	Comparison Against	Method/Participants	Mean Followup Time	Grading Scale	CGE %	Outcome Summary
Intramuscular Anterior Transposition
	Kleinman and Bishop (1989)6	Retrospective		40 patients, 52 procedures	28 months	Bishop Score	0.87	87% Excellent or Good, 4% Fair, 9% Poor
	Emamhadi et al. (2017)49	Retrospective	SubQ	40 patients intramuscular, 43 patients subcutaneous	-	-	-	Intramuscular transposition had better motor but equivalent pain and sensory recovery compared with subcutaneous
